# Supplementary figures and images for: Identification of significant gene and pathways involved in HBV-related hepatocellular carcinoma by bioinformatics analysis
Source: PeerJ journal article supplement (doi:10.7717/peerj.7408), 2019-07-30

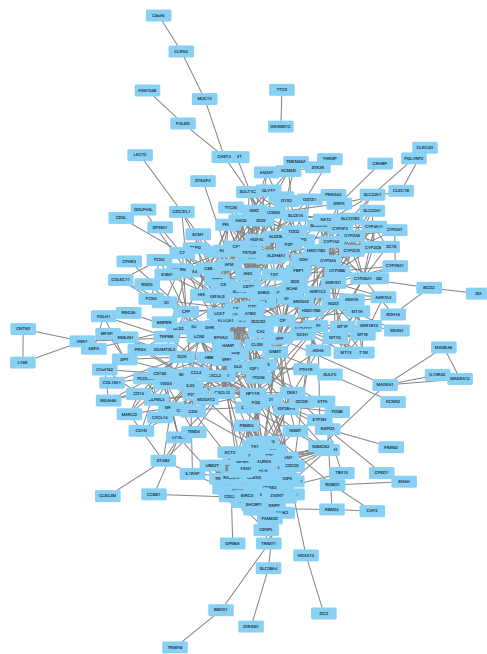

Supplement: support.zip [file support.zip]
